# Supplementary material for: TRIM71 Deficiency Causes Germ Cell Loss During Mouse Embryogenesis and Is Associated With Human Male Infertility
Source: PubMed Central journal article supplement (PMC8155544; doi:10.3389/fcell.2021.658966), 2021-05-13
Supplement: Data_Sheet_1.pdf [file Data_Sheet_1.pdf]

# Supplementary Data

## ***TRIM71* deficiency causes germ cell loss during mouse embryogenesis and is associated with human male infertility**

Lucia A. Torres-Fernández\*, Jana Emich\*, Yasmine Port\*, Sibylle Mitschka, Marius Wöste, Simon Schneider, Daniela Fietz, Manon S. Oud, Sara Di Persio, Nina Neuhaus, Sabine Kliesch, Michael Hölzel, Hubert Schorle, Corinna Friedrich, Frank Tüttelmann and Waldemar Kolanus

Submitted to *Frontiers in Cell and Developmental Biology* on 26.01.2021.  
Accepted on 30.03.2021.

# Supplementary Figure 1

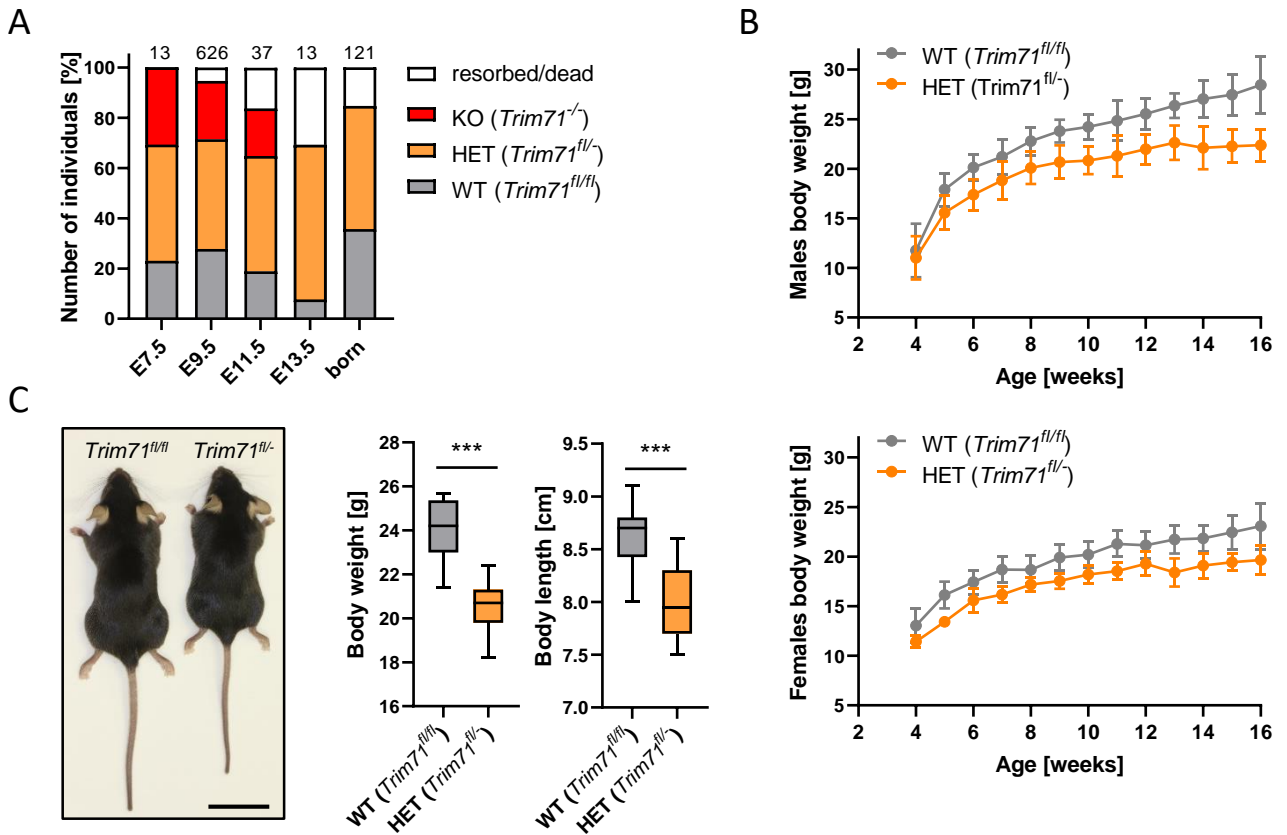

**Supplementary Figure 1 (relative to Figure 1). *Trim71* heterozygous animals reveal a haploinsufficiency of *Trim71* gene. A)** Genotyping statistics of embryos from *Trim71* heterozygous intercrosses depicted as percentages. Embryonic lethality of full *Trim71* knockout (KO, *Trim71*<sup>-/-</sup>) mice is shown by an alteration of Mendelian ratios in the neonatal (born, n=121) population (\*\*P-value < 0.005, Chi square test), with embryos resorbed between E9.5-13.5. The numbers of analyzed individuals in each case are indicated above the columns. **B)** Growth curves (weight gain over time) for *Trim71* wild type (WT, *Trim71*<sup>fl/fl</sup>) versus *Trim71* heterozygous (HET, *Trim71*<sup>fl/fl</sup>) mice for male (top) and female (bottom) mice. Error bars represent SEM (n=3-15). Weight gain overtime was significantly different between wild type and heterozygous mice for both males and females: \*\*\*P-value < 0.005 (unpaired Student's t-test on area under curve (AUC) measurements). **C)** Representative image of adult male wild type and *Trim71* heterozygous mice accompanied by a quantification of body weight [g] and body length [cm] of adult (10-week-old) males. Scale bar represents 2 cm. Graphs represent Tukey plots (n=11-15). \*\*\*P-value < 0.005 (unpaired Student's t-test).

## Supplementary Figure 2

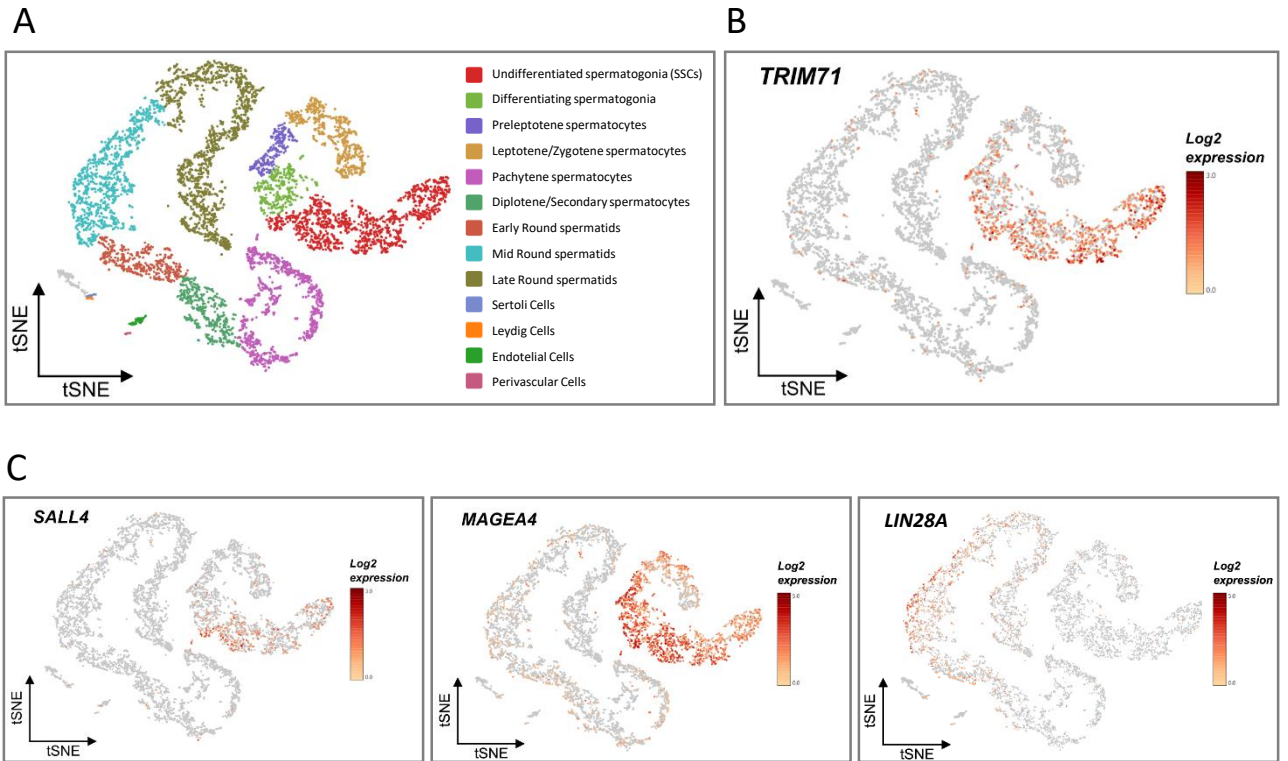

**Supplementary Figure 2 (relative to Figure 1). *TRIM71* is expressed in spermatogonial stem cells (SSCs) in adult human testes. A)** tSNE plot (t-distributed stochastic neighbor embedding) of single-cell transcriptome data (scRNA-seq) from human testes as published by Hermann *et al.*, 2018. Each dot represents a single cell and is colored according to its cluster identity as indicated in the figure key. **B)** Expression pattern of *TRIM71* and **C)** *SALL4*, *MEGEA4* and *LIN28A* projected on the tSNE plot of the human scRNA-seq dataset. Note that *LIN28A* is not an SSC marker in humans. Red indicates high expression and gray indicates low or no expression, as shown by the figure key.

# Supplementary Figure 3

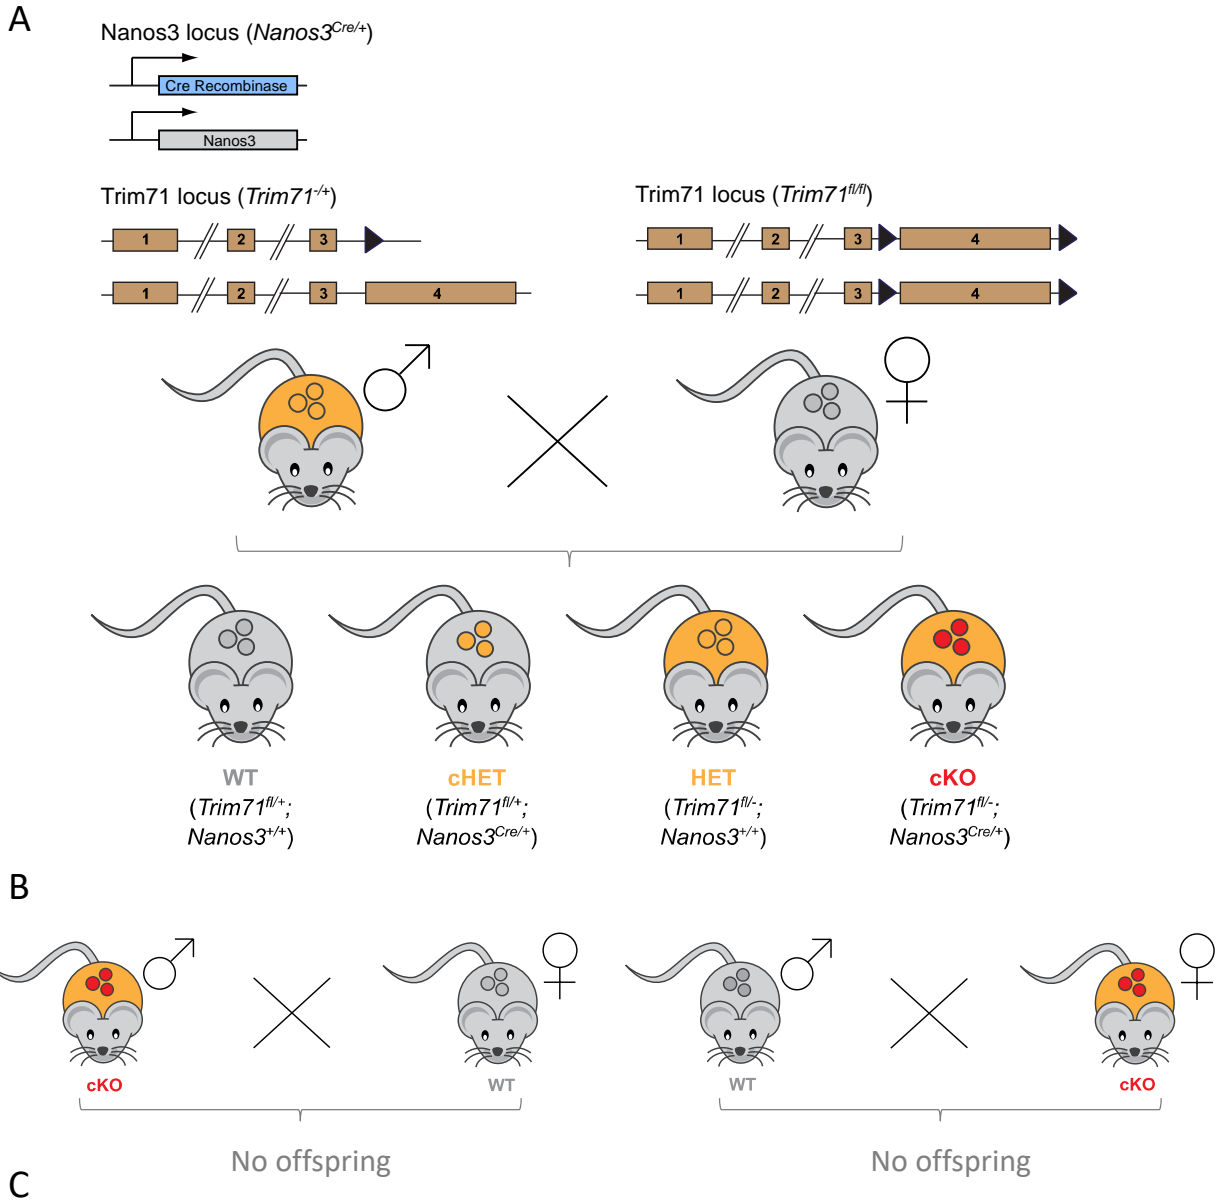

**C**

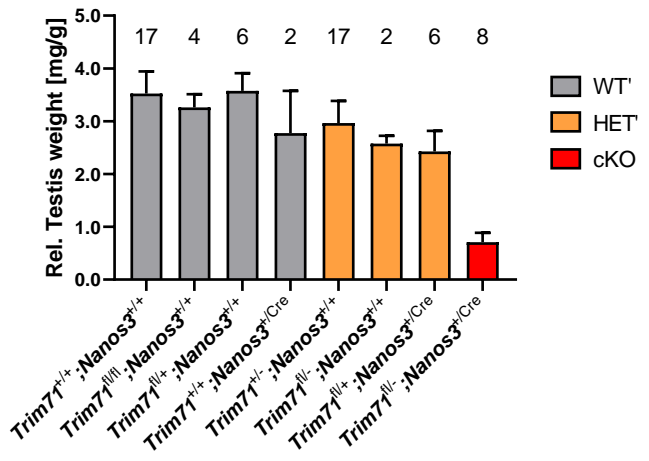

**Supplementary Figure 3 (relative to Figures 2 and 3). *Trim71* is essential for fertility.** **A)** Schematic representation for the generation of a germline-specific *Trim71* conditional knockout (cKO) mouse. Heterozygous (*Trim71*<sup>+/-</sup>) males additionally carrying the *Nanos3*-Cre allele (*Nanos3*<sup>Cre/+</sup>) were crossed with homozygously floxed *Trim71* (*Trim71*<sup>fl/fl</sup>) females. The circles depicted inside the mice bodies represent the germline in adult males and females. Body and germline colors are indicative of the genotype: grey = WT, wild type (+/+, fl/fl or +/-); orange = HET, heterozygous (+/- or fl/-) *Trim71* deletion; red = cKO, homozygous (-/-) *Trim71* deletion. **B)** Schematic representation of intercrosses for the functional characterization of *Trim71* cKO mice. No male or female germline-specific *Trim71* cKO mouse was able to generate offspring in the course of several months. **C)** Testis weight [mg] relative to total body weight [g] of adult male mice with different *Trim71* and *Nanos3* genotypes. In this case, colors are indicative of the *Trim71* genotype in the germline, regardless of *Nanos3* genotype. WT' = wild type *Trim71* locus (+/+, fl/fl or +/-) with different *Nanos3* genotypes; HET' = heterozygous (+/- or fl/-) *Trim71* locus with different *Nanos3* genotypes. These results are summarized in main Fig. 2C joining several *Nanos3* genotypes per *Trim71* genotype. Error bars represent SEM and the numbers of analyzed individuals in each case are indicated above the columns.

## Supplementary Figure 4

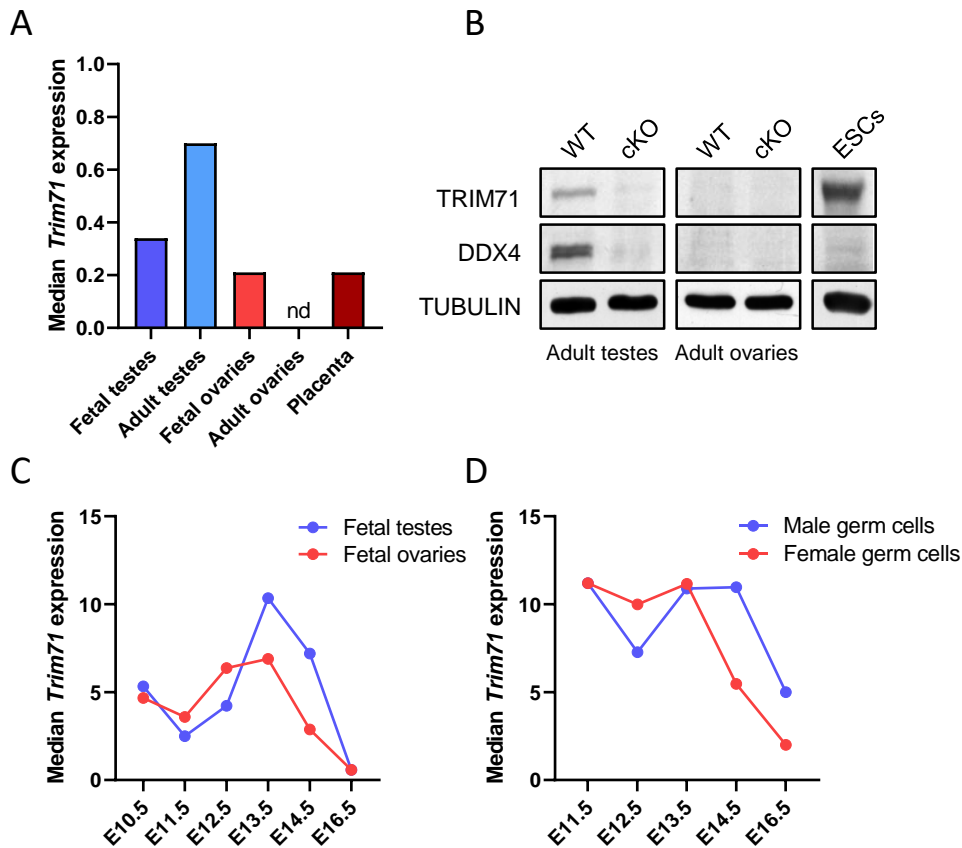

**Supplementary Figure 4 (relative to Figures 2 and 3). Analysis of *Trim71* expression in available datasets reveals a common expression pattern in the embryonic germline of male and female mice. **A**) Median *Trim71* expression detected in fetal and adult mouse gonads as well as female placenta via Microwell-Seq as published by Han *et al.*, 2018, *Cell*. Nd = non-detected. **B**) Representative immunoblot showing TRIM71 protein expression in adult testes and ovaries from 9-month old wild type (*Trim71*<sup>+/+</sup>; *Nanos3*<sup>Cre/+</sup>) and *Trim71* cKO (*Trim71*<sup>fl/fl</sup>; *Nanos3*<sup>Cre/+</sup>) mice, compared to its expression in murine ESCs. DDX4 was used as a germ cell-specific marker known to be present in adult testes but not in adult ovaries (Zhang *et al.*, 2015, *Nat. Med.*). TUBULIN was used as a loading control. **C**) Median *Trim71* expression detected in murine fetal male and female gonads at different developmental stages via RNA-Seq as published by Soh *et al.*, 2015, *PLoS Genet.* and Zhao *et al.*, 2018, *Mol. Cell. Endocrinol.* **D**) Median *Trim71* expression detected in murine male and female germ cells at different developmental stages via RNA-Seq as published by Seisenberger *et al.*, 2012, *Mol. Cell*. The data depicted in A, C and D was obtained from ReproGenomics Viewer (<https://rgv.genouest.org/studies/>).**

# Supplementary Figure 5

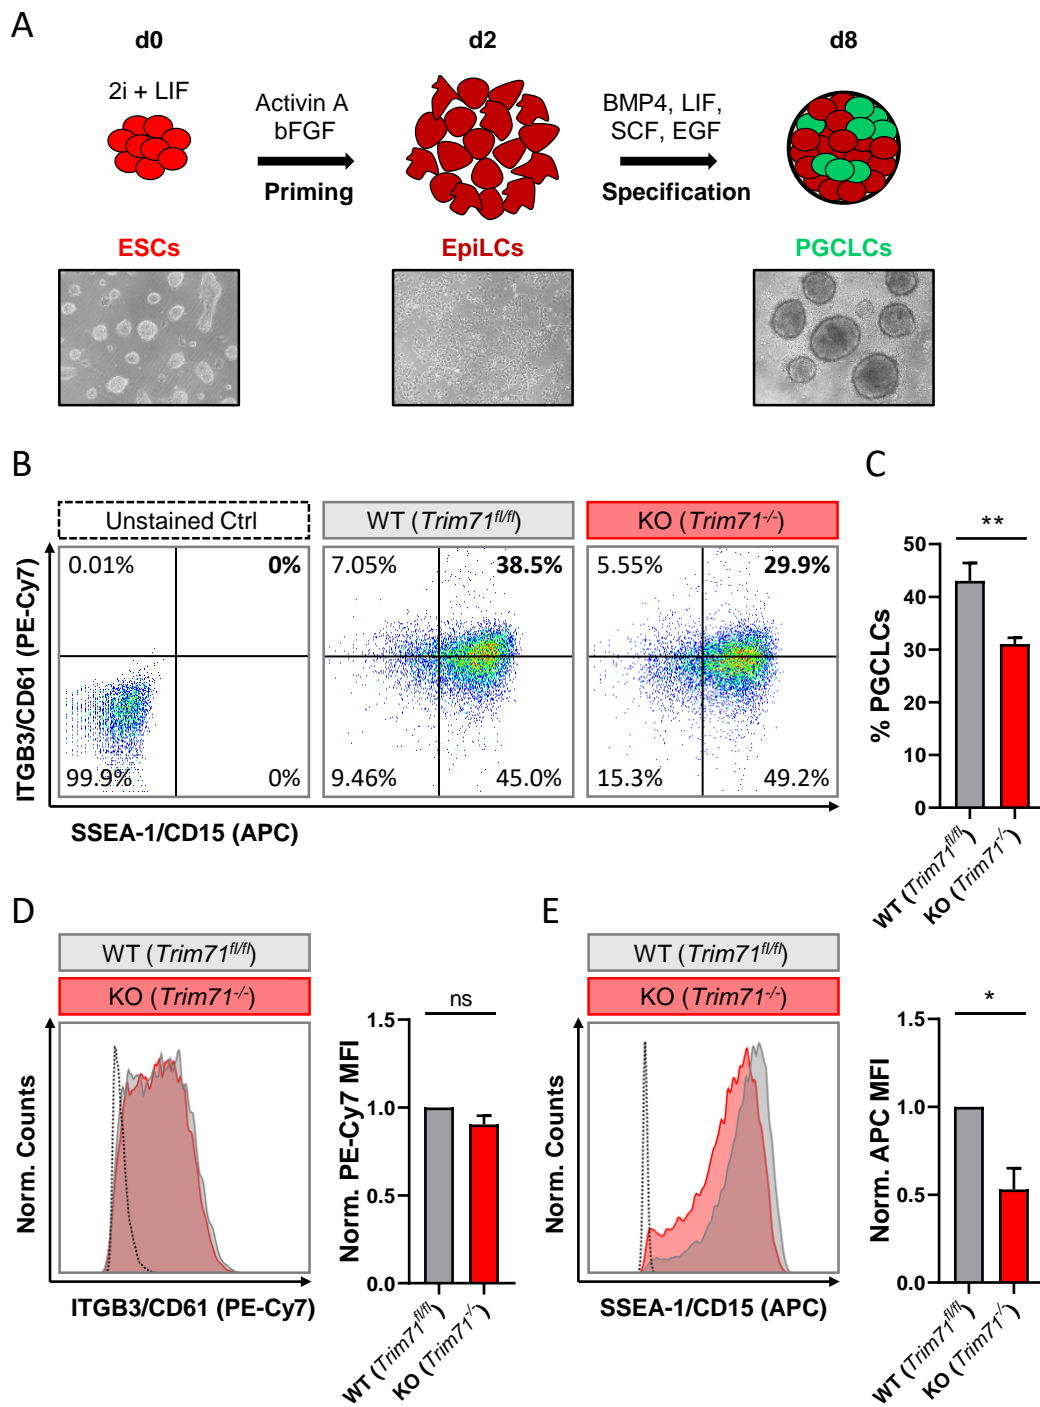

**Supplementary Figure 5. *In vitro* PGC specification reveals reduced numbers of PGCLCs derived from *Trim71*-deficient ESCs.** **A)** Schematic representation of the methodology for the *in vitro* differentiation of murine ESCs into PGC-like cells (PGCLCs) accompanied by representative microscopic images (10x magnifications) of cells at different stages of the differentiation process (d0, d2 and d8). **B)** Representative flow cytometry scatter plots from d8 cells (whole aggregates) derived from wild type (WT, *Trim71*<sup>f/f</sup>) and *Trim71* knockout (KO, *Trim71*<sup>-/-</sup>) mouse ESCs stained for the PGC-specific surface markers ITGB3/CD61 (PE-Cy7) and SSEA-1/CD15 (APC). Double positively stained cells are considered PGCLCs. **C)** Quantification of PGCLCs in several experimental replicates of B (n = 6). \*\*P-value < 0.01 (unpaired Student's t-test). **D)** Representative histograms for individual ITGB3/CD61 (PE-Cy7) and **E)** SSEA-1/CD15 (APC) stainings of d8 cells derived from wild type (WT, *Trim71*<sup>f/f</sup>) and *Trim71* knockout (KO, *Trim71*<sup>-/-</sup>) murine ESCs accompanied by the median fluorescence intensity (MFI) quantification for the respective staining in replicate experiments (n = 6). \*P-value < 0.05; ns = non-significant (paired Student's t-test). For all graphs, error bars represent the SEM. See also Suppl. Fig. 5 and 6.



# Supplementary Figure 6

WT (*Trim71<sup>fl/fl</sup>*)  
 KO (*Trim71<sup>-/-</sup>*)

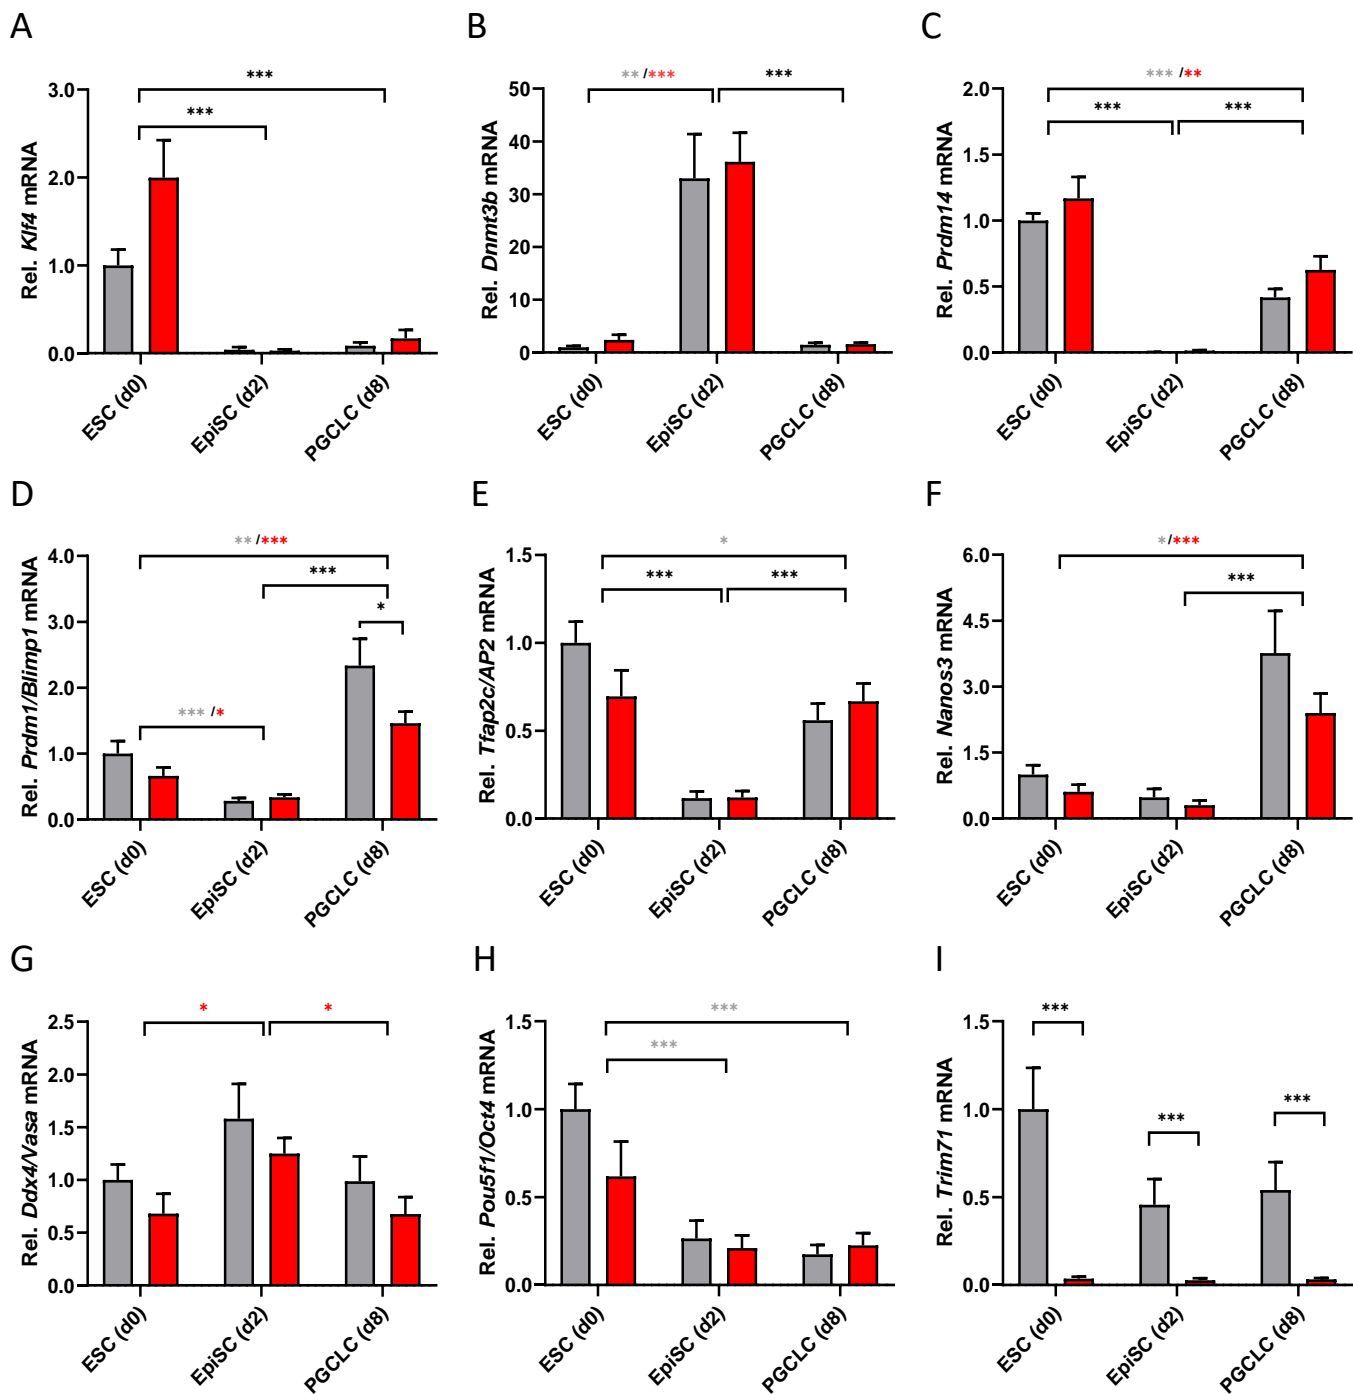

**Supplementary Figure 6 (relative to Supplementary Figure 5). Monitoring *in vitro* differentiation of ESCs into PGCLCs.** qRT-PCR analysis of the indicated markers to monitor the priming and specification processes of mouse ESCs into PGCLCs, measured at d0 (ESCs, naïve pluripotency), d2 (EpiLCs, primed pluripotency) and d8 (PGCLCs, representing E9.5 PGCs). As detailed in the main text, *Klf4* is a marker of naïve pluripotency and *Dnmt3b* of primed pluripotency, while *Trim71* and *Pou5f1/Oct4* expression is expected in both naïve and primed stem cells. *Prdm14*, *Prdm1/Blimp1*, *Tfap2c* and *Nanos3* are early PGC markers expected to be upregulated at d8 compared to d2. *Ddx4/Vasa* is a late PGC marker expected to be upregulated after PGC migration to the genital ridges (E10.5). For all graphs, error bars represent the SEM. \*\*\*P-value < 0.005, \*\*P-value < 0.01; \*P-value < 0.05; black stars represent equal statistical significance for both genotypes, while grey and red stars represent specific significance for wild type (WT, *Trim71<sup>fl/fl</sup>*) and *Trim71* knockout (KO, *Trim71<sup>-/-</sup>*) cells, respectively (unpaired Student's t-test).

## Supplementary Figure 7

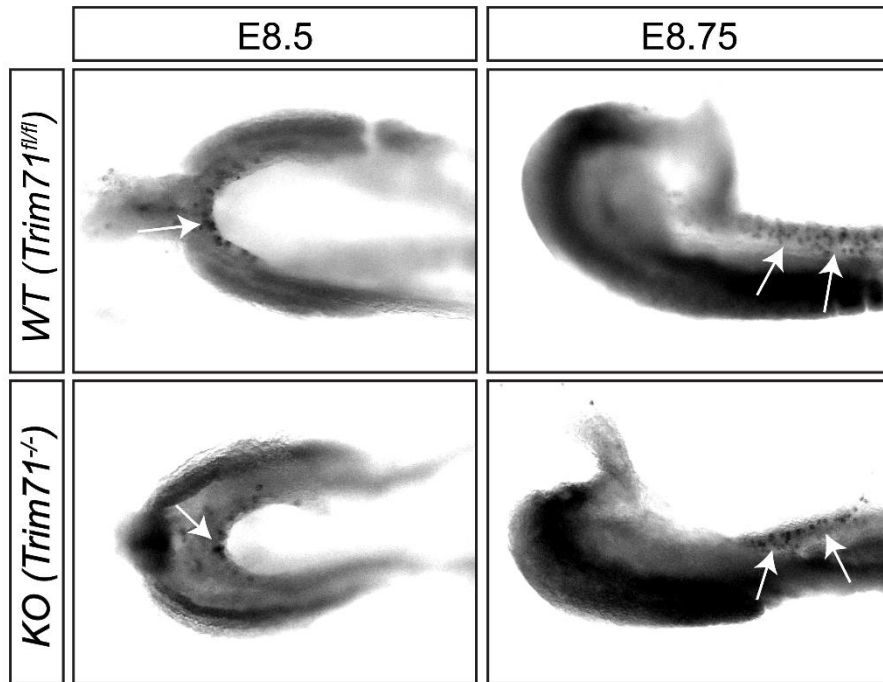

**Supplementary Figure 7. *Trim71* deficiency does not impair *in vivo* PGC migration towards the genital ridges.** Alkaline phosphatase (AP) staining in wild type (WT, *Trim71<sup>fl/fl</sup>*) and full *Trim71* knockout (KO, *Trim71<sup>-/-</sup>*) embryos at stages E8.5-8.75 (n = 4-6 embryos per genotype, from two different mothers). PGCs (AP-positive cells) are marked with white arrows in posterior hindgut pieces from E8.5 (dorsal view) and E8.75 (lateral view) sibling embryos from the mating of full heterozygous animals (HET, *Trim71<sup>fl/-</sup>*).

# Supplementary Figure 8

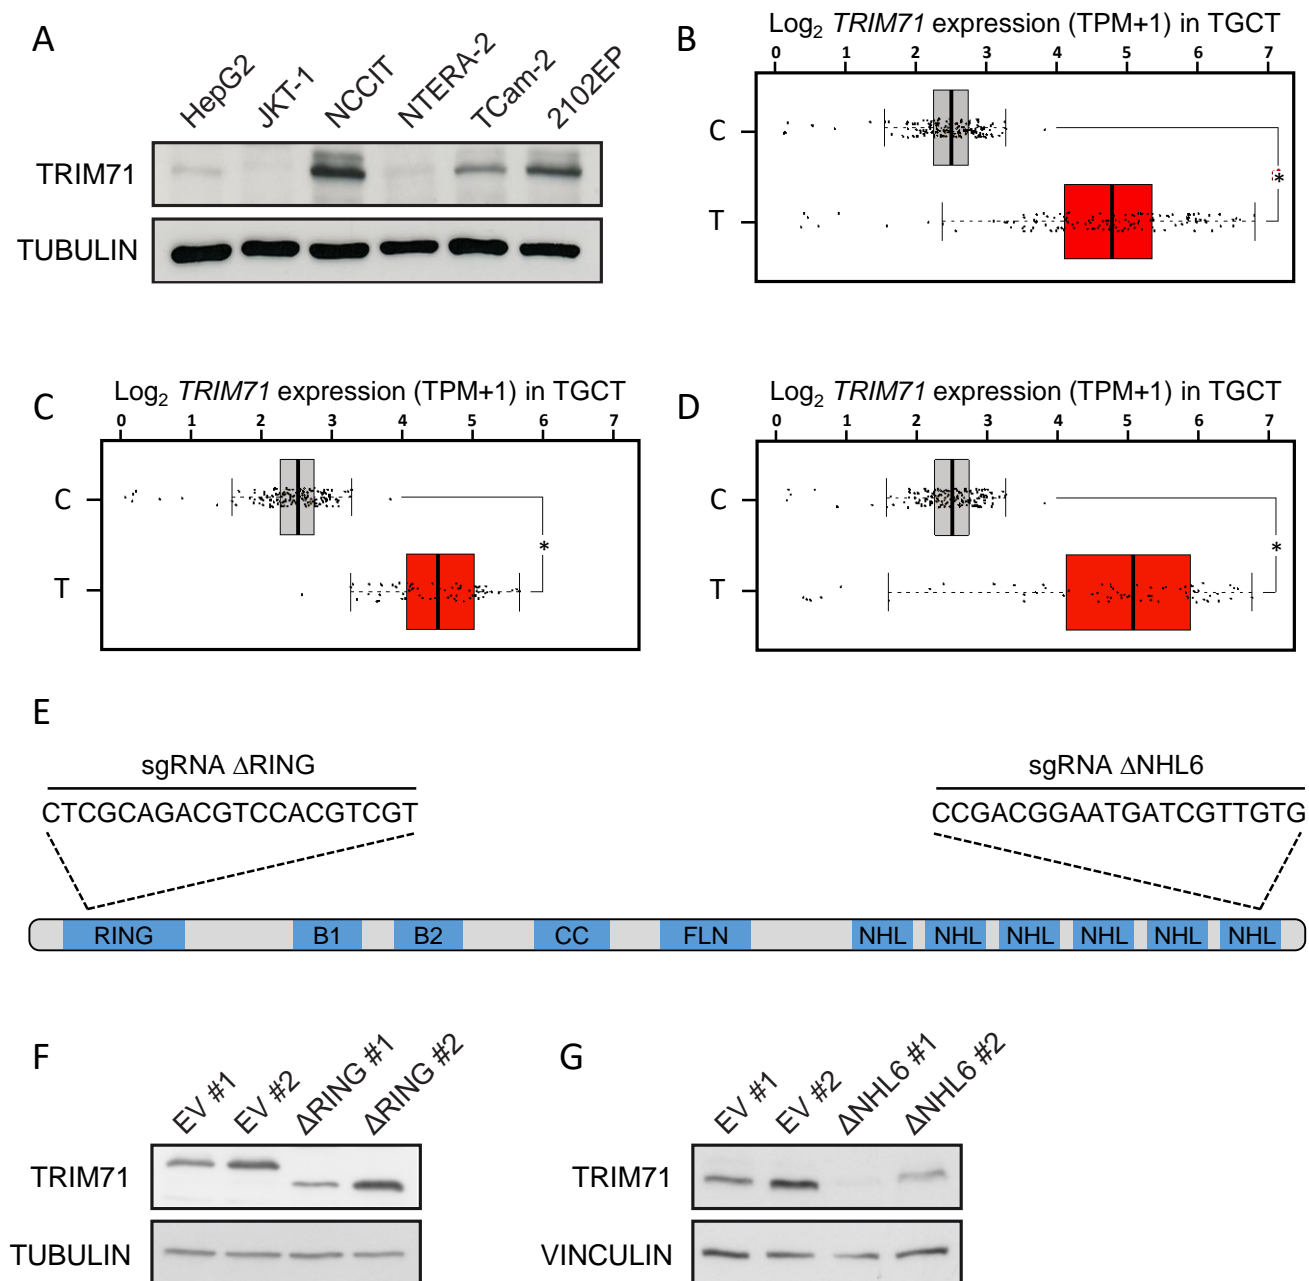

**Supplementary Figure 8 (relative to Figure 5). Generation of *TRIM71* mutations via CRISPR/Cas9 in NCCIT cells.** **A)** Representative immunoblot showing TRIM71 protein expression in several germ cell tumor (GCT)-derived embryonic carcinoma cell lines. TUBULIN was used as a loading control. **B)** *TRIM71* expression is upregulated in human testicular germ cell tumor (TGCT) patients. Box plot graph was obtained from GEPIA (<http://gepia2.cancer-pku.cn>) and shows *TRIM71* mRNA levels in human control (C, n = 165) and tumor (T, n = 196) samples. Tumor samples include seminoma (n = 131) and non-seminoma (n = 65) TGCT subtypes. TPM = transcript counts per million. **C)** *TRIM71* expression in TGCT patients from B, depicting control (C, n=165) versus only seminoma tumor (T, n = 131) samples. **D)** *TRIM71* expression in TGCT patients from B, depicting control (C, n = 165) versus only non-seminoma tumor (T, n = 65) samples. **E)** Schematic representation of TRIM71 structural domain organization indicating the location and target sequences (single guide RNA = sgRNA) for the generation of NCCIT cells with *TRIM71* frameshift mutations in the RING domain ( $\Delta$ RING) and the NHL domain ( $\Delta$ NHL6) via CRISPR/Cas9. **F)** Representative immunoblot showing TRIM71 protein in two single NCCIT clones targeted with sgRNA  $\Delta$ RING including wild type cells transfected with an empty vector (EV). Of note, *TRIM71* RING mutant NCCIT cells ( $\Delta$ RING) express a RINGless protein of 83 kDa due to the usage of an alternative in-frame ATG codon located downstream of the targeted sequence. **G)** Representative immunoblot showing TRIM71 protein in two single NCCIT clones targeted with sgRNA  $\Delta$ NHL6 including wild type cells transfected with an empty vector (EV). For *TRIM71* NHL mutant NCCIT cells ( $\Delta$ NHL6) the deletion of the last C-terminal 24 aa (clone #1) renders an unstable protein which seems to be degraded while the deletion of the last C-terminal 18 aa (clone #2) renders a stable C-terminal truncated protein of 92 kDa.

# Supplementary Figure 9

## NCCIT pure populations

- Wild type reads
- Reads with frameshift mutations
- Reads with in-frame mutations

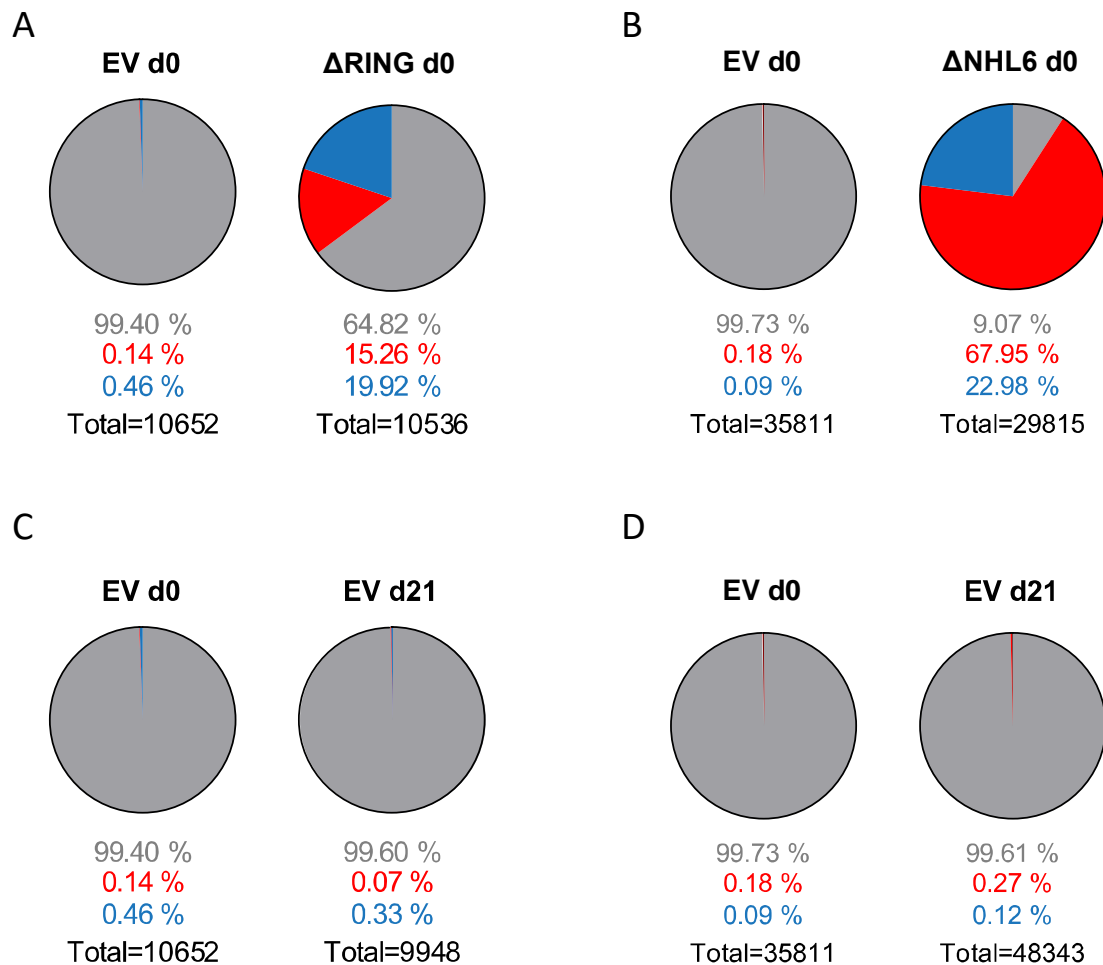

**Supplementary Figure 9 (relative to Figure 5). NGS analysis via Illumina MiSeq platform of pure NCCIT wild type and *TRIM71* mutant populations. A)** Pie charts showing allele frequencies at d0 for wild type NCCIT cells transfected with an empty vector (EV) and mutant NCCIT cells transfected with a sgRNA targeting TRIM71's RING domain ( $\Delta$ RING). The depicted pure populations were then mixed 1:1 and cultured for growth competition assays in which allele frequencies were measured at different time points via Illumina MiSeq analysis (corresponding to Fig. 6A). **B)** Pie charts showing allele frequencies at d0 for wild type NCCIT cells transfected with an empty vector (EV) and mutant NCCIT cells transfected with a sgRNA targeting TRIM71's NHL domain ( $\Delta$ NHL6). The depicted pure populations were then mixed 1:1 and cultured for growth competition assays in which allele frequencies were measured at different time points via Illumina MiSeq analysis (corresponding to Fig. 6B). **C)** Pie charts showing allele frequencies at d0 and d21 for wild type NCCIT cells transfected with an empty vector (EV) from A. **E)** Pie charts showing allele frequencies at d0 and d21 for NCCIT cells transfected with an empty vector (EV) from B.

# Supplementary Figure 10

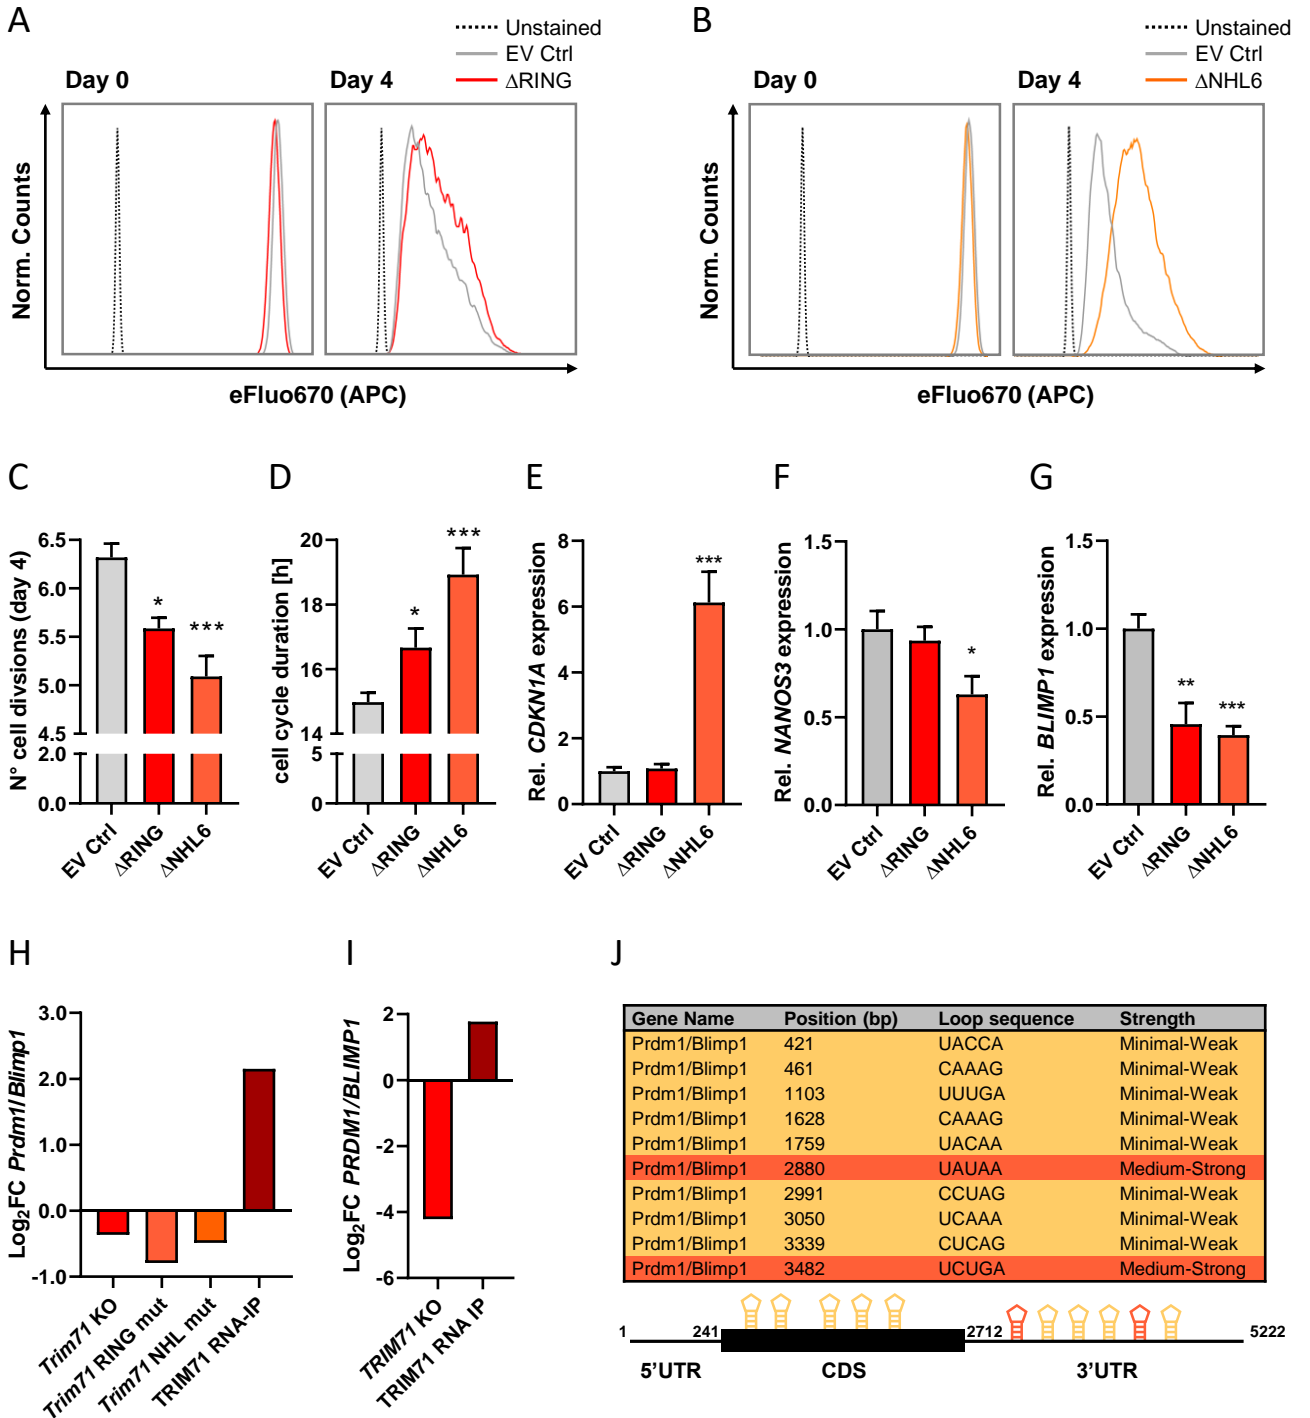



**Supplementary Figure 10 (relative to Figure 5). *TRIM71* mutant NCCIT cells show proliferation defects and deregulation of PGC markers.** **A)** Representative flow cytometry eFluo670 (APC) histograms for the proliferation assays with wild type (EV Ctrl) and *TRIM71* mutant  $\Delta$ RING or **B)**  $\Delta$ NHL6 NCCIT cells, showing comparable fluorescence intensity for the different cell populations after staining (day 0) and differences in fluorescence intensity at the end of the experiment (day 4). A slower loss of fluorescence intensity over time is apparent in *TRIM71* mutant NCCIT histograms as compared to wild type cells in each case, and is indicative of a decreased proliferation (n = 3-6). **C)** Number of cell divisions undergone at the end of the experiment (day 4) by wild type (EV Ctrl) and *TRIM71* mutant  $\Delta$ RING and  $\Delta$ NHL6 NCCIT cells. The number of divisions was calculated assuming that the MFI of the proliferation dye eFluo670 (APC) decreases by half upon each cell division, as  $\log_2[(\text{MFI}_{\text{day0}} - \text{MFI}_{\text{unstained}})/(\text{MFI}_{\text{day4}} - \text{MFI}_{\text{unstained}})]$ . (n = 3-6). **D)** Average duration of the cell cycle in hours (h) for wild type (EV Ctrl) and *TRIM71* mutant  $\Delta$ RING and  $\Delta$ NHL6 NCCIT cells, calculated by dividing the total experimental time (4 days = 96 h) by the number of cell divisions (n = 3-6). **E)** RT-qPCR measurements for the expression of *CDKN1A*, **F)** *NANOS3* and **G)** *BLIMP1* in wild type (EV Ctrl) and *TRIM71* mutant  $\Delta$ RING and  $\Delta$ NHL6 NCCIT cells (n = 3-6). For all graphs, error bars represent the SEM. \*\*\*P-value < 0.005, \*\*P-value < 0.01; \*P-value < 0.05 (unpaired Student's t-test). **H)** Fold change expression (Log2FC) of *Prdm1/Blimp1* in *Trim71 KO*, RING mutant (C12LC15A) and NHL mutant (R738A) mouse ESCs (in each case relative to wild type ESCs), accompanied by the fold enrichment of *Prdm1/Blimp1* mRNA co-precipitated with full-length *TRIM71* wild type protein via RNA-IPs in mouse ESCs, as published by Welte *et al.*, 2019, *Genes Dev*. The *TRIM71* RING mutant C12LC15A contains point mutations in two catalytic cysteines which impair *TRIM71*'s role as an E3 ligase, and the *TRIM71* NHL mutant R738A contains a point mutation which impairs its ability to bind mRNAs. **I)** Fold change expression (Log2FC) of *PRDM1/BLIMP1* in *Trim71 KO* human hepatocellular carcinoma (HCC) Huh7 cells relative to wild type Huh7 cells, as published by Welte *et al.*, 2019, *Genes Dev.*, accompanied by the fold enrichment of *PRDM1/BLIMP1* mRNA co-precipitated with full-length *TRIM71* wild type protein via RNA-IPs in HCC HepG2 cells, as published by Foster *et al.*, 2020, *Cell cycle*. The data in H and I supports a *TRIM71*-mediated positive regulation of *BLIMP1* expression via direct binding and stabilization of its mRNA. **J)** *TRIM71*-binding sites identified for *Blimp1* mRNA in ESCs as published by Welte *et al.*, 2019. The table (top) information was extracted and adapted from Welte *et al.*, 2019 supplementary materials and used to depict the schematic representation of *TRIM71*-binding sites along the *Blimp1* mRNA (bottom). The hairpin color correlates with the hairpin strength. UTR = untranslated region; CDS = coding sequence.

# Supplementary Figure 11

A

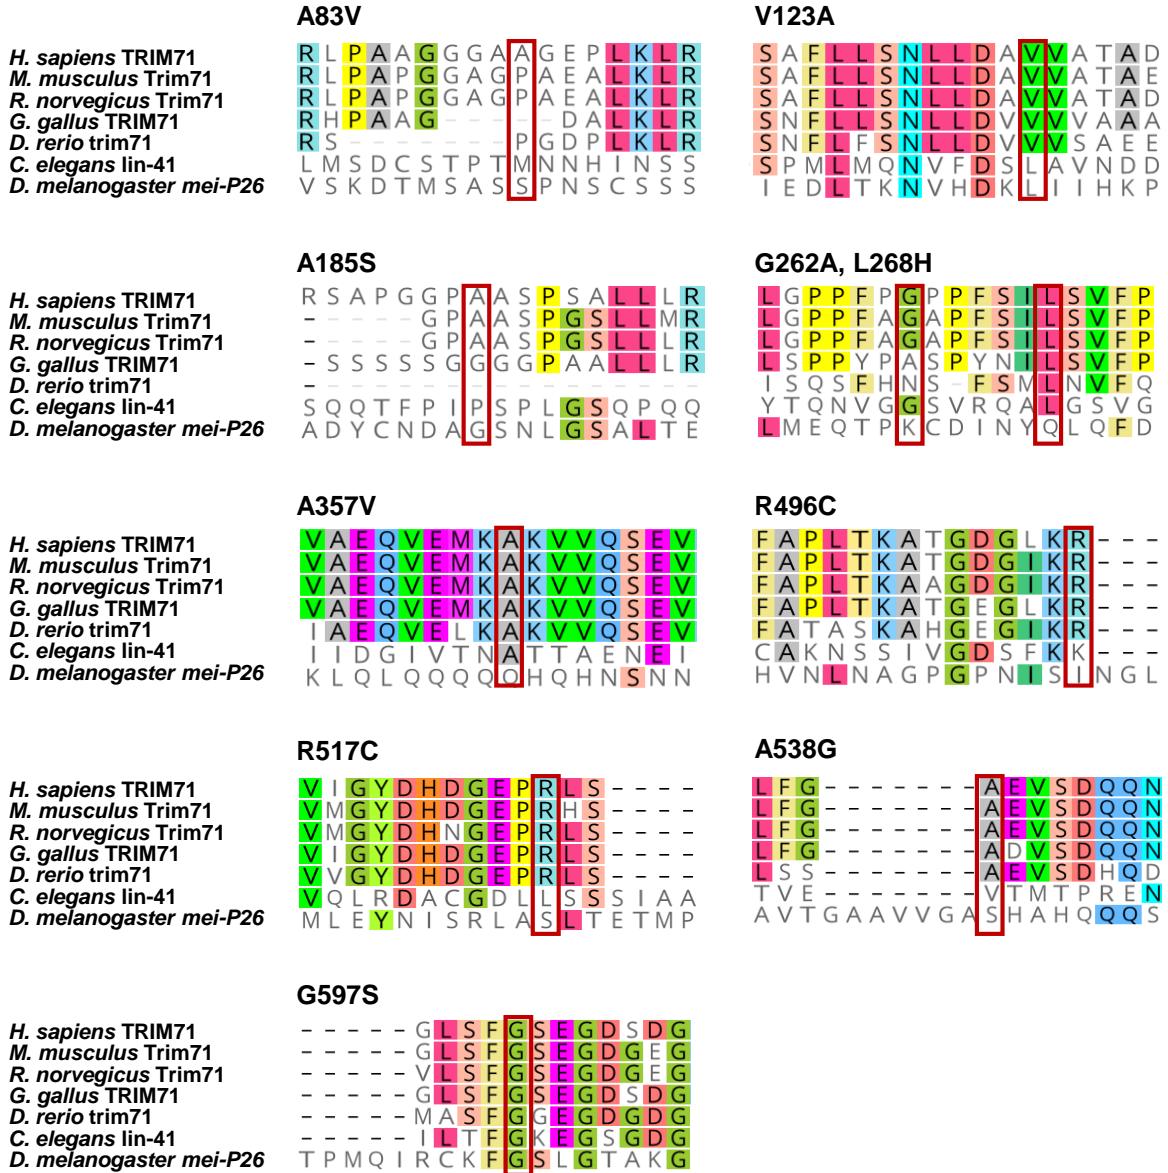

B

## TRIM71 LoF variant c224\_240dup/p.(Gly81CysfsTer24)

G C G G C G G C G G C G G C C G T C G G C C A C G C G G A G C T C C G T C C C G C  
 C G G C G G C G G C G G C G T C G G C C A C G

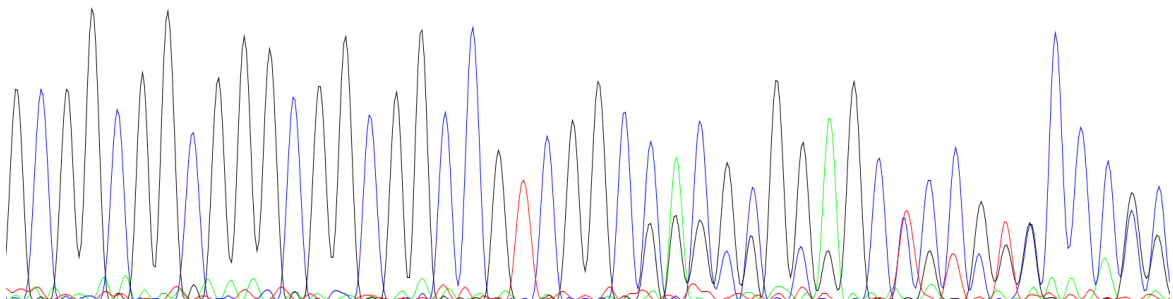

**Supplementary Figure 11 (relative to Figure 6). Analysis of the evolutionary conservation of *TRIM71* genetic variants found in male infertile patients. A)** Sequence conservation for the *TRIM71* genetic variants found in individuals of the MERGE cohort, obtained from MEGA/ClustalW and Geneious Prime. Affected amino acids are indicated in red boxes across all examined vertebrate and invertebrate species. **B)** Electropherogram resulting from Sanger sequencing of DNA from an SCO patient (subject M364) showing the duplication c.224\_240dup resulting in the frameshift p.(Gly81CysfsTer24) in *TRIM71* locus (reverse strand).

# Supplementary Figure 12

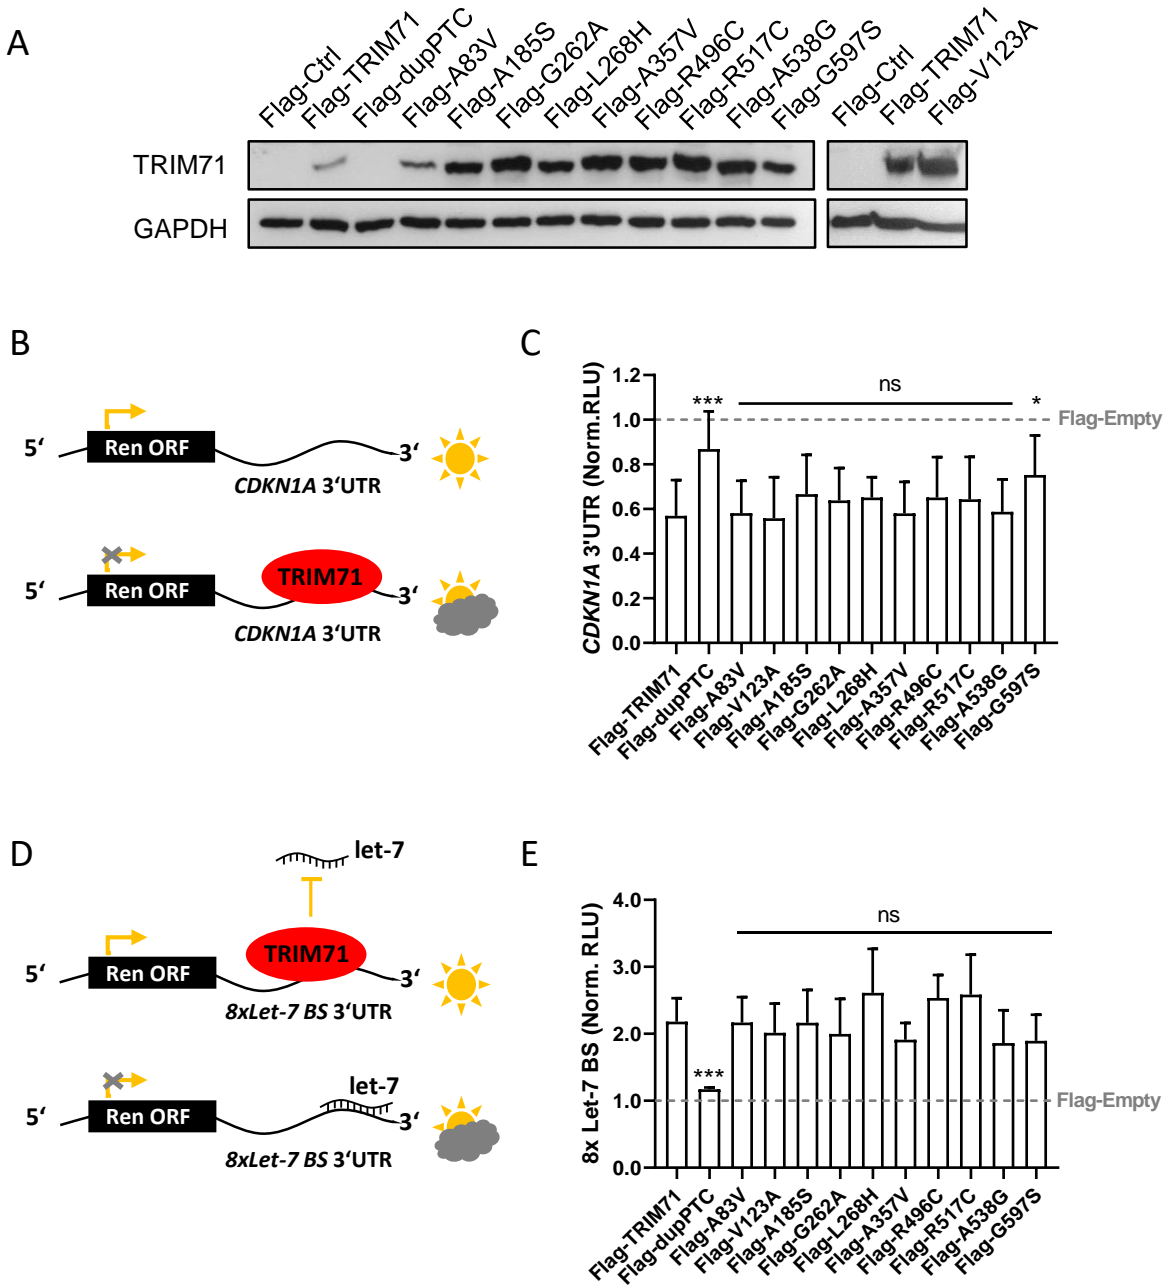

**Supplementary Figure 12 (relative to Figure 6). Functional characterization of the human *TRIM71* variants identified in infertile men via exome sequencing analysis.** **A)** Representative immunoblot analysis showing the expression of all *TRIM71* variants identified in a cohort of infertile men with severely impaired spermatogenesis. All variants were cloned as Flag-tagged constructs in mammalian expression vectors and overexpressed in HEK293T cells. Protein lysates were prepared 48 hpt. GAPDH was used as loading control. **B)** Schematic representation of *CDKN1A* 3'UTR luciferase reporter assays. *TRIM71* is able to repress the expression of a Renilla luciferase under the control of the human full-length *CDKN1A* 3'UTR resulting in a decrease of the reporter activity, as published by Torres-Fernández *et al.*, 2019, *Nucleic Acids Res.* **C)** Luciferase reporter assays showing the repression of the *CDKN1A* 3'UTR reporter by different *TRIM71* variants compared to that of the full-length wild type *TRIM71*, all of which were normalized to the repression mediated by a Flag-empty control construct (depicted by the grey baseline). (n = 5-10). **D)** Schematic representation of let-7 miRNA luciferase reporter assays. *TRIM71* is able to repress the activity of the miRNA let-7 via direct binding and stabilization of let-7 target mRNAs, as published by Torres-Fernández *et al.*, 2021, *BioRxiv*. *TRIM71*-mediated let-7 activity inhibition results in the derepression and increased activity of a Renilla luciferase under the control of an artificial 3'UTR containing 8x let-7 binding sites. **E)** Luciferase reporter assays showing the derepression of the let-7 reporter by different *TRIM71* variants compared to that of the full-length wild type *TRIM71*, all of which were normalized to the repression mediated by a Flag-empty control construct (depicted by the grey baseline). (n = 3-10). Ren = Renilla Luciferase; Norm. RLU = Normalized Relative Light Units; ORF = Open Reading Frame. UTR = untranslated region; BS = binding sites. DupPTC = duplication generating a premature termination codon. For all graphs, error bars represent the SD. \*\*\*P-value < 0.005; \*P-value < 0.05; ns = non-significant (One-way ANOVA comparing each *TRIM71* variant to the full-length wild type *TRIM71*).

## Supplementary Table 1

| Variant (cDNA) | Variant (protein)   | Classification    | Fulfilled criteria |
|----------------|---------------------|-------------------|--------------------|
| c.224_240dup   | p.(Gly81CysfsTer24) | likely pathogenic | PS3, PM2, PP3      |
| c.248C>T       | p.(Ala83Val)        | VUS               | PM1, PM2, BP4      |
| c.368T>C       | p.(Val123Ala)       | VUS               | PM2, PP3           |
| c.553G>T       | p.(Ala185Ser)       | likely benign     | BS2, BP4           |
| c.785G>C       | p.(Gly262Ala)       | likely benign     | BS2, BP4           |
| c.803T>A       | p.(Leu268His)       | VUS               | PM2                |
| c.1070C>T      | p.(Ala357Val)       | VUS               | BP5*               |
| c.1486C>T      | p.(Arg496Cys)       | VUS               | PM1, PP3           |
| c.1549C>T      | p.(Arg517Cys)       | VUS               | PM1, PP3, BS2      |
| c.1613C>G      | p.(Ala538Gly)       | VUS               | PM1, PM2           |
| c.1789G>A      | p.(Gly597Ser)       | VUS               | PM1, PP3, BS2      |

**Supplementary Table 1 (relative to Figure 6).** Classification of identified *TRIM71* variants according to ACMG/AMP guidelines. Fulfilled classification criteria are indicated for each variant. VUS = Variant of uncertain significance. Abbreviations in accordance with ACMG: PS = pathogenic strong, PM = pathogenic moderate, PP = pathogenic supporting, BP = benign supporting, BS = benign strong. \*This *TRIM71* variant was found in a patient with alternative molecular cause for disease, namely a frameshift variant in *SYCP2* gene (see also Suppl. Table 2).

## Supplementary Table 2

| Supplementary Table 2A. Infertility-associated genes (Reviewed in Oud <i>et al.</i> , 2019. Human Reproduction) |                                                                                                                 |                             |         |                          |         |          |        |         |
|-----------------------------------------------------------------------------------------------------------------|-----------------------------------------------------------------------------------------------------------------|-----------------------------|---------|--------------------------|---------|----------|--------|---------|
| ABCA1                                                                                                           | CCDC141                                                                                                         | DMRT1                       | FGFR1   | INSL3                    | NOS1    | REC8     | SPO11  | UBE2B   |
| ADGRG2                                                                                                          | CCDC155                                                                                                         | DNAAF2                      | FLNA    | JAG1                     | NOTCH1  | RELN     | SRA1   | UBR2    |
| AK7                                                                                                             | CCDC39                                                                                                          | DNAAF4                      | FSHB    | KDM3A                    | NR0B1   | RNF220   | SRD5A2 | USP26   |
| AKAP4                                                                                                           | CCDC40                                                                                                          | DNAAF5                      | FSHR    | KISS1R                   | NR5A1   | RSPH1    | SRY    | VAMP7   |
| AMH                                                                                                             | CDC14A                                                                                                          | DNAH1                       | FSIP2   | KLHL10                   | NRAS    | RSPH3    | STK36  | WDR11   |
| AMHR2                                                                                                           | CEP135                                                                                                          | DNAH9                       | GALNTL5 | LHB                      | NSMF    | RSPH9    | STX2   | WDR66   |
| ANOS1                                                                                                           | CEP290                                                                                                          | DNAI1                       | GAS8    | LHCGR                    | PANK2   | RSPO1    | SUN5   | WT1     |
| APOA1                                                                                                           | CFAP43                                                                                                          | DNAI2                       | GATA4   | LRRC6                    | PDHA2   | SECISBP2 | SYCE1  | XRCC2   |
| AR                                                                                                              | CFAP44                                                                                                          | DNAJB13                     | GH1     | MAGEB4                   | PIH1D3  | SEMA3A   | SYCP3  | ZMYND15 |
| AURKC                                                                                                           | CFAP69                                                                                                          | DNMT1                       | GNRH1   | MAMLD1                   | PKD1    | SLC26A3  | TAC3   | ZBPB    |
| BMP4                                                                                                            | CFTR                                                                                                            | DNMT3B                      | GNRHR   | MAP2K2                   | PLCZ1   | SLIT2    | TACR3  |         |
| BMP7                                                                                                            | CHD7                                                                                                            | DPY19L2                     | GTF2H3  | MAP3K1                   | PLEKHA5 | SOS1     | TAF4B  |         |
| BNC2                                                                                                            | CYP11A1                                                                                                         | E2F1                        | HAUS7   | MC4R                     | PLK4    | SOX10    | TDRD6  |         |
| BRAF                                                                                                            | CYP11B1                                                                                                         | ERBB4                       | HESX1   | MEI1                     | PLXNA1  | SOX2     | TDRD7  |         |
| BRDT                                                                                                            | CYP17A1                                                                                                         | FANCA                       | HS6ST1  | MEIOB                    | PMFBP1  | SOX3     | TDRD9  |         |
| BSCL2                                                                                                           | CYP19A1                                                                                                         | FANCM                       | HSD17B3 | MNS1                     | POLR3B  | SOX8     | TEX11  |         |
| C11orf70                                                                                                        | CYP21A2                                                                                                         | FATE1                       | HSD3B2  | MTOR                     | PROK2   | SOX9     | TEX14  |         |
| CATSPER1                                                                                                        | DCC                                                                                                             | FEZF1                       | HSF2    | NANOS2                   | PROKR2  | SPAG17   | TEX15  |         |
| CATSPERE                                                                                                        | DHH                                                                                                             | FGF17                       | HYDIN   | NLRP3                    | PSMC3IP | SPATA16  | TRIM37 |         |
| CCDC103                                                                                                         | DMC1                                                                                                            | FGF8                        | IL17RD  | NNT                      | RBMXL2  | SPINK2   | TTL5   |         |
| Supplementary Table 2B. Infertility-associated genes (reported recently in independent studies)                 |                                                                                                                 |                             |         |                          |         |          |        |         |
| ADAD2                                                                                                           | Krausz <i>et al.</i> , 2020. Genetics in Medicine                                                               |                             |         |                          |         |          |        |         |
| M1AP                                                                                                            | Wyrwoll <i>et al.</i> , 2020. AJHG                                                                              |                             |         |                          |         |          |        |         |
| MSH4                                                                                                            | Krausz <i>et al.</i> , 2020. Genetics in Medicine                                                               |                             |         |                          |         |          |        |         |
| RAD21L1                                                                                                         | Krausz <i>et al.</i> , 2020. Genetics in Medicine                                                               |                             |         |                          |         |          |        |         |
| RNF212                                                                                                          | Riera-Escamilla <i>et al.</i> , 2019. Human Reproduction                                                        |                             |         |                          |         |          |        |         |
| SHOC1                                                                                                           | Krausz <i>et al.</i> , 2020. Genetics in Medicine                                                               |                             |         |                          |         |          |        |         |
| STAG3                                                                                                           | Riera-Escamilla <i>et al.</i> , 2019. Human Reproduction. Van der Bijl <i>et al.</i> , 2019. Human Reproduction |                             |         |                          |         |          |        |         |
| SYCP2                                                                                                           | Schilit <i>et al.</i> , 2020. AJHG                                                                              |                             |         |                          |         |          |        |         |
| TERB1                                                                                                           | Krausz <i>et al.</i> , 2020. Genetics in Medicine & Salas-Huetos <i>et al.</i> , 2020. Human Genetics           |                             |         |                          |         |          |        |         |
| TERB2                                                                                                           | Salas-Huetos <i>et al.</i> , 2020. Human Genetics                                                               |                             |         |                          |         |          |        |         |
| MAJIN                                                                                                           | Salas-Huetos <i>et al.</i> , 2020. Human Genetics                                                               |                             |         |                          |         |          |        |         |
| Supplementary Table 2C. Variants identified in infertility-associated genes in patients with TRIM71 variants    |                                                                                                                 |                             |         |                          |         |          |        |         |
| Subject ID                                                                                                      | TRIM71 variant                                                                                                  | Infertility-associated gene |         | Variant                  |         |          |        |         |
| M1686                                                                                                           | c.1070C>T/p.(Ala357Val)                                                                                         | SYCP2                       |         | heterozygous, frameshift |         |          |        |         |
| M1083                                                                                                           | c.1486C>T/p.(Arg496Cys)                                                                                         | NNT*                        |         | heterozygous, missense   |         |          |        |         |
| M468                                                                                                            | c.1549C>T/p.(Arg517Cys)                                                                                         | TERB1*                      |         | homozygous, missense     |         |          |        |         |
| M468                                                                                                            | c.1549C>T/p.(Arg517Cys)                                                                                         | NOTCH1*                     |         | heterozygous, missense   |         |          |        |         |
| M468                                                                                                            | c.1549C>T/p.(Arg517Cys)                                                                                         | TDRD7*                      |         | heterozygous, missense   |         |          |        |         |
| M754                                                                                                            | c.1789G>A/p.(Gly597Ser)                                                                                         | HSD3B2*                     |         | heterozygous, missense   |         |          |        |         |
| M2141                                                                                                           | c.1789G>A/p.(Gly597Ser)                                                                                         | CCDC141*                    |         | heterozygous, missense   |         |          |        |         |

**Supplementary Table 2 (relative to Figure 6).** Analysis of exome data from infertile men carrying *TRIM71* variants for the identification of variants in other genes previously associated with male infertility in humans. \*Variants of uncertain significance.

## Supplementary Table 3

| <b>Supplementary Table 3A. Genotyping primers</b>           |                                |
|-------------------------------------------------------------|--------------------------------|
| <i>Trim71_F1</i>                                            | 5'-GAAAGGAGGCTAGCCAAAGG-3'     |
| <i>Trim71_R1</i>                                            | 5'-ATGCTGTACGGTAGGAGTCTTC-3'   |
| <i>Trim71_R2</i>                                            | 5'-CACACAAAAAACCAACACACAG-3'   |
| <i>Nanos3_F1</i>                                            | 5'-CCAGCCATGGGGACTTTC-3'       |
| <i>Nanos3_R1</i>                                            | 5'-GGGACTGATAGATGGCAC-3'       |
| <i>Nanos3_R2</i>                                            | 5'-CAGAGGCCACTTGTGTAGCG-3'     |
| <b>Supplementary Table 3B. qRT-PCR primers (SYBR Green)</b> |                                |
| <i>Klf4_F</i>                                               | 5'-GCGAACTCACACAGGCGAGAAAC-3'  |
| <i>Klf4_R</i>                                               | 5'-TCGCTTCCTCTTCTCCGACA-3'     |
| <i>Prdm14_F</i>                                             | 5'-CAGCGACTTCATTGCCAAAGGAG-3'  |
| <i>Prdm14_R</i>                                             | 5'-GCCGTCGATAAAATGGCTCAGG-3'   |
| <i>Prdm1/Blimp1_F</i>                                       | 5'-ACCCCTCATCGGTGAAGTCTACA-3'  |
| <i>Prdm1/Blimp1_R</i>                                       | 5'-CTCCTCTCTGGAATAGATCCGCCA-3' |
| <i>Ddx4/Vasa_F</i>                                          | 5'-TCATACTTGCAGGACGAGATTG-3'   |
| <i>Ddx4/Vasa_R</i>                                          | 5'-AACGACTGGCAGTTATTCCATC-3'   |
| <i>18 sRNA_F</i>                                            | 5'-GTAACCCGTTGAACCCATTTC-3'    |
| <i>18 sRNA_R</i>                                            | 5'-CCATCCAATCGGTAGTAGCGAC-3'   |
| <i>TFAP2C_F</i>                                             | 5'-CCCATCGAGGTCTTCTGCTC-3'     |
| <i>TFAP2C_R</i>                                             | 5'-AGAGTCACATGAGCGGCTTT-3'     |
| <i>DDX4/VASA_F</i>                                          | 5'-TCATACTTGCAGGACGAGATTG-3'   |
| <i>DDX4/VASA_R</i>                                          | 5'-AACGACTGGCAGTTATTCCATC-3'   |
| <b>Supplementary Table 3C. qRT-PCR probes (TaqMan)</b>      |                                |
| <i>Trim71</i>                                               | Mm01341471_m1                  |
| <i>Sall4</i>                                                | Mm00453037_s1                  |
| <i>Lin28a</i>                                               | Mm00524077_m1                  |
| <i>Lin28b</i>                                               | Mm01190673_m1                  |
| <i>Pou5f1/Oct4</i>                                          | Mm03053917_g1                  |
| <i>Dmnt3b</i>                                               | Mm01240113_m1                  |
| <i>Tfap2c</i>                                               | Mm00493473_m1                  |
| <i>Nanos3</i>                                               | Mm00808138_m1                  |
| <i>Hprt</i>                                                 | Mm03024075_m1                  |
| <i>TRIM71</i>                                               | Hs01394933_m1                  |
| <i>CDKN1A</i>                                               | Hs00355782_m1                  |
| <i>PRDM1/BLIMP1</i>                                         | Hs_00153357                    |
| <i>NANOS3</i>                                               | Hs_00928455                    |
| <b>Supplementary Table 3D. siRNAs</b>                       |                                |
| siCtrl (Renilla)                                            | 5'-AAACATGCAGAAAATGCTG-3'      |
| siTRIM71#1                                                  | 5'-CCGTGTGCGACCAGAAAGTA-3'     |
| siTRIM71#2                                                  | 5'-CCAGATCTGCTTGTGTGCAA-5'     |

**Supplementary Table 3 (relative to Methods).** Primers and Probes used for the amplification of murine and human genes in genotyping or qRT-PCR analysis, and siRNAs sequences used to knock down human *TRIM71* expression in TCam-2 cells. F = forward; R = reverse. TaqMan probes were acquired from Applied Biosystems (Thermo Fischer Scientific).



## Supplementary Table 4

| <b>Supplementary Table 4A. Primary Antibodies</b>   |                  |                       |                 |                    |                                    |
|-----------------------------------------------------|------------------|-----------------------|-----------------|--------------------|------------------------------------|
| <b>Protein</b>                                      | <b>Conjugate</b> | <b>Source Species</b> | <b>Dilution</b> | <b>Application</b> | <b>Supplier_Reference</b>          |
| GCNA1/TRA98                                         | -                | rat                   | 1:500           | IF                 | Abcam_ab82527                      |
| WT1                                                 | -                | rabbit                | 1:50            | IF                 | Abcam_ab89901                      |
| TRIM71                                              | -                | rabbit                | 1:1000          | WB                 | Sigma_HPA038142                    |
| DDX4/VASA                                           | -                | goat                  | 1:500           | WB                 | Santa Cruz_sc-48707                |
| TUBULIN                                             | -                | mouse                 | 1:2000          | WB                 | Sigma_T9026                        |
| VINCULIN                                            | -                | mouse                 | 1:2000          | WB                 | Sigma_V9131                        |
| GAPDH                                               | -                | mouse                 | 1:2000          | WB                 | Acris_ACP001P                      |
| THY1.2/CD90.2                                       | FITC             | rat                   | 1:400           | FACS/MACS          | Biolegend_140303                   |
| SSEA-1/CD15                                         | Alexa 647        | mouse                 | 1:200           | FACS               | Biolegend_125607                   |
| ITGB3/CD61                                          | PE-Cy7           | armenian hamster      | 1:400           | FACS               | Biolegend_104317                   |
| <b>Supplementary Table 4B. Secondary Antibodies</b> |                  |                       |                 |                    |                                    |
| <b>Protein</b>                                      | <b>Conjugate</b> | <b>Source Species</b> | <b>Dilution</b> | <b>Application</b> | <b>Supplier_Reference</b>          |
| rat IgG                                             | Alexa 488        | donkey                | 1:250           | IF                 | Jackson ImmunoResearch_712-545-153 |
| rabbit IgG                                          | Cy3              | donkey                | 1:400           | IF                 | Jackson ImmunoResearch_711-165-152 |
| rabbit IgG                                          | HRP              | goat                  | 1:5000          | WB                 | Cell Signaling Technologies_7074   |
| mouse IgG                                           | HRP              | horse                 | 1:5000          | WB                 | Cell Signaling Technologies_7076   |
| goat IgG                                            | HRP              | rabbit                | 1:10000         | WB                 | Santa Cruz Biotechnology_sc-2768   |

**Supplementary Table 4 (relative to Methods).** Antibodies used for immunofluorescence (IF), western blot (WB), flow cytometry (FACS) and magnetic-assisted cell sorting (MACS).
